1 **A low-cost recombinant glycoconjugate vaccine confers immunogenicity and**  
2 **protection against enterotoxigenic *Escherichia coli* infections in mice**

3

4 Asher J. Williams<sup>1</sup>, Katherine F. Warfel<sup>2,3,4</sup>, Primit Desai<sup>5</sup>, Jie Li<sup>6</sup>, Jen-Jie Lee<sup>6</sup>, Derek A.  
5 Wong<sup>2,3,4</sup>, Sarah E. Sobol<sup>2,3,4</sup>, Michael C. Jewett<sup>2,3,4</sup>, Yung-Fu Chang<sup>6</sup> and Matthew P.  
6 DeLisa<sup>1,5,7\*</sup>

7

8 <sup>1</sup>Robert F. Smith School of Chemical and Biomolecular Engineering, Cornell University,  
9 Ithaca, NY 14853 USA

10 <sup>2</sup>Department of Chemical and Biological Engineering, Northwestern University, 2145  
11 Sheridan Road, Technological Institute E136, Evanston, IL 60208, USA

12 <sup>3</sup>Chemistry of Life Processes Institute, Northwestern University, 2170 Campus Drive,  
13 Evanston, IL 60208, USA

14 <sup>4</sup>Center for Synthetic Biology, Northwestern University, 2145 Sheridan Road,  
15 Technological Institute E136, Evanston, IL 60208, USA

16 <sup>5</sup>Biochemistry, Molecular and Cell Biology, Cornell University, Ithaca, NY 14853

17 <sup>6</sup>Department of Population Medicine and Diagnostic Sciences, College of Veterinary  
18 Medicine, Cornell University, Ithaca, NY, 14853 USA

19 <sup>7</sup>Cornell Institute of Biotechnology, Cornell University, Ithaca, NY 14853 USA

20

21 \*Address correspondence to: Matthew P. DeLisa, Robert Frederick Smith School of  
22 Chemical and Biomolecular Engineering, Cornell University, Ithaca, NY 14853 USA. Tel:  
23 607-254-8560; Email: [md255@cornell.edu](mailto:md255@cornell.edu)

24

25

26

27

28

29

30

31

## 1 **ABSTRACT**

2 Enterotoxigenic *Escherichia coli* (ETEC) is the primary etiologic agent of traveler's  
3 diarrhea and a major cause of diarrheal disease and death worldwide, especially in infants  
4 and young children. Despite significant efforts over the past several decades, an  
5 affordable vaccine that significantly reduces mortality and morbidity associated with  
6 moderate to severe diarrhea among children under the age of 5 years remains an unmet  
7 aspirational goal. Here, we describe robust, cost-effective biosynthetic routes that  
8 leverage glycoengineered strains of non-pathogenic *Escherichia coli* or their cell-free  
9 extracts for producing conjugate vaccine candidates against two of the most prevalent O  
10 serogroups of ETEC, O148 and O78. Specifically, we demonstrate site-specific  
11 installation of O-antigen polysaccharides (O-PS) corresponding to these serogroups onto  
12 licensed carrier proteins using the oligosaccharyltransferase PglB from *Campylobacter*  
13 *jejuni*. The resulting conjugates stimulate strong O-PS-specific humoral responses in  
14 mice and elicit IgG antibodies that possess bactericidal activity against the cognate  
15 pathogens. We also show that one of the prototype conjugates decorated with serogroup  
16 O148 O-PS confers protection against ETEC infection in mice. We anticipate that our  
17 bacterial cell-based and cell-free platforms will enable creation of multivalent formulations  
18 with the potential for broad ETEC serogroup protection and increased access through  
19 low-cost biomanufacturing.

20

## 21 **INTRODUCTION**

22 Enterotoxigenic *Escherichia coli* (ETEC) is one of the most common causes of diarrheal  
23 disease worldwide and the leading cause of traveler's diarrhea, especially in locations  
24 where clean water and sanitation remain limited <sup>1, 2</sup>. In addition to acute diarrhea-  
25 associated morbidity, ETEC is also one of the leading causes of mortality,  
26 disproportionately affecting children under the age of 5 years who lack immunity from  
27 prior exposure <sup>3, 4</sup>. Deaths from infectious diarrhea have been on the decline for a few  
28 decades, due in part to the introduction of oral rehydration therapy. However, ETEC  
29 continues to wreak havoc in terms of acute morbidity and associated sequelae that  
30 compound the impact of infection in young children, including growth stunting,  
31 malnutrition, and impaired cognitive impairment <sup>5, 6</sup>.

1           A vaccine that prevents both acute illness as well as the sequelae associated with  
2 ETEC infection has long been a priority of the World Health Organization (WHO) <sup>7</sup>. At  
3 present, ETEC vaccine development efforts are primarily centered on inducing immune  
4 responses against a subset of important virulence factors including colonization factor/cell  
5 surface (CF/CS) antigens and enterotoxins, namely heat-stable toxin (ST) and heat-labile  
6 toxin (LT) <sup>8-11</sup>. These factors comprise a classical model for ETEC molecular  
7 pathogenesis in which ETEC colonizes the small intestine using plasmid-encoded CF/CS  
8 antigens followed by production of one or more enterotoxin (*e.g.*, LT, ST) that drive fluid  
9 export and diarrhea <sup>12</sup>. Despite significant efforts over several decades, human trials  
10 involving vaccine candidates based on this classical paradigm have met limited success  
11 <sup>11, 13-15</sup>. Hence, further improvements are needed to increase the levels of protection  
12 against more severe ETEC diarrhea and to expand protection to the breadth of ETEC  
13 serotypes. Consequently, there are still no licensed vaccines for ETEC.

14           To expand the repertoire of antigens that could be targeted in future vaccine  
15 designs, several studies have assessed adaptive immune responses in humans following  
16 either experimental challenge with ETEC or oral administration of an inactivated ETEC  
17 vaccine <sup>16-18</sup>. A number of non-canonical antigens beyond the classic vaccine targets  
18 were identified, including secreted proteins (*e.g.*, EatA, EtpA, and YghJ), cell surface-  
19 expressed proteins (*e.g.*, Ag43, OmpW), and lipopolysaccharide (LPS), among others.  
20 Unlike the secreted and cell-surface protein antigens, LPS are glycolipids that include an  
21 outermost O-antigen polysaccharide (O-PS) component that is composed of repeating  
22 subunits that extend from the surface of the bacteria <sup>19</sup>. Interestingly, the inactivated  
23 ETEC vaccine strain, ETVAX, elicited response frequencies against serogroup O78 LPS  
24 (which is expressed on the strain) that were comparable to or higher than those against  
25 the vaccine CFs in infants. This suggests that LPS is a potent antigen that may contribute  
26 to vaccine-induced protection <sup>17</sup>. Other studies have indicated that O-PS is common  
27 among ETEC strains associated with diarrheal illness <sup>20, 21</sup>, with more than 78 O  
28 serogroups identified in ~1,000 ETEC isolates from widespread locations <sup>20</sup>. While this  
29 number is impractically high for developing a broadly protective, multivalent vaccine, 10  
30 of these serogroups (O6, O8, O9, O25, O27, O78, O128, O148, O153 and O159) account  
31 for >75% of the isolates, suggesting that a 10-valent polysaccharide vaccine could afford

1 broad protection with the fewest components possible. At present, however, virtually no  
2 attention has been paid to ETEC LPS/O-PS as a subunit vaccine antigen.

3 One barrier to the development of an LPS/O-PS-based vaccines in general is the  
4 fact that purified polysaccharides, while partially immunogenic in adults, are often  
5 completely incapable of eliciting an antibody response in infants and children, the  
6 population for whom an ETEC vaccine is most needed. This problem results from an  
7 inability of polysaccharides to interact with the receptors on T cells, but can be solved by  
8 covalently coupling the LPS or O-PS structure to a CD4<sup>+</sup> T cell-dependent antigen such  
9 as an immunogenic protein carrier <sup>22</sup>. The resulting conjugates invoke a T-cell response  
10 that results in strong polysaccharide-specific antibody responses, immunological  
11 memory, and high immunogenicity in young children <sup>23</sup>. Indeed, conjugates are a highly  
12 efficacious and safe strategy for protecting against virulent pathogens, with successful  
13 vaccines licensed worldwide against *Haemophilus influenzae*, *Neisseria meningitidis*  
14 serogroups (tetravalent), *Streptococcus pneumoniae* (up to 20-valent), and *Salmonella*  
15 *typhi*, and many others in clinical development <sup>23</sup>.

16 Despite their effectiveness, traditional conjugate vaccines are not without their  
17 drawbacks. Most notable among them is the complex, multistep process required for the  
18 purification, isolation, and conjugation of bacterial polysaccharides, which is expensive,  
19 time consuming, and low yielding <sup>24</sup>. A greatly simplified and cost-effective alternative  
20 involves metabolic engineering of bacteria to generate recombinant strains that serve as  
21 mini factories for one-step production of an unlimited and renewable supply of pure  
22 conjugates <sup>25</sup>. This bioconjugation approach is based on engineered protein glycosylation  
23 in non-pathogenic *E. coli* strains, wherein an O-PS molecule is conjugated to a co-  
24 expressed carrier protein by the *Campylobacter jejuni* oligosaccharyltransferase (OST)  
25 PglB (CjPglB) <sup>26</sup>. To date, several unique conjugates have been produced by this method,  
26 with a few currently under clinical investigation <sup>25</sup>. Building on these cell-based efforts, we  
27 recently described a method called iVAX (*in vitro* conjugate vaccine expression) that  
28 enables conjugate vaccine biosynthesis using cell-free extracts derived from  
29 glycosylation-competent *E. coli* strains <sup>27</sup>. The iVAX platform promises to accelerate  
30 vaccine development and enable decentralized, cold chain-independent  
31 biomanufacturing by using cell lysates, rather than living cells, to make conjugates *in vitro*.

1           In the current study, we describe two biosynthetic routes – one cell-based and the  
2 other cell-free – for low-cost production of conjugate vaccine candidates against two of  
3 the most prevalent O serogroups of ETEC, O148 and O78<sup>20</sup>. Both routes enabled site-  
4 specific installation of ETEC O-PS onto carrier proteins used in licensed vaccines, namely  
5 the nonacylated form of protein D (PD) from *Haemophilus influenzae* and cross-reactive  
6 material 197 (CRM<sub>197</sub>), a genetically detoxified variant of the *Corynebacterium diphtheriae*  
7 toxin (DT). The resulting conjugates stimulated strong O-PS-specific IgG antibody titers  
8 in mice, with the resulting antibodies possessing bactericidal activity against the cognate  
9 pathogens. For one of the prototype conjugates decorated with serogroup O148 O-PS,  
10 we further demonstrated protective efficacy against ETEC infection in mice. Overall, our  
11 work expands the inventory of antigens for ETEC vaccine design and provides an  
12 important first step towards the creation of a custom, multivalent vaccine with potential  
13 for broad ETEC coverage and increased access through adoption of simplified, low-cost  
14 biomanufacturing platforms.

15

## 16 **RESULTS**

### 17 **Expression of ETEC serogroup O148 O-PS antigen in non-pathogenic *E. coli* cells.**

18 Biosynthesis of the O-PS antigen from ETEC serogroup O148 involved plasmid pMW07-  
19 O148<sup>28, 29</sup>, which encodes the 10.2 kb O-PS gene cluster from ETEC strain B7A (serotype  
20 O148:H28)<sup>30</sup> (**Fig. 1a**). To confirm O-PS expression, we took advantage of the fact that  
21 O-PS antigens assembled in the cytoplasmic membrane of *E. coli* cells are transferred  
22 onto lipid A-core by the O-antigen ligase, WaaL. The lipid A-core-linked O-PS molecules  
23 are then shuttled to the outer membrane, becoming displayed on the cell surface where  
24 they are readily detectable with antibodies or lectins having specificity for the O-PS  
25 structure. As expected, non-pathogenic *E. coli* W3110 cells, which carry a copy of the  
26 *waaL* gene, were observed to express the ETEC O-PS antigen on their surface as  
27 evidenced by cross reactivity of nitrocellulose-spotted cells with an anti-ETEC O148  
28 antibody (**Supplementary Fig. 1a**). The binding observed for these cells was on par with  
29 that measured for ETEC strain B7A<sup>31</sup>, which natively expresses the O148 O-PS antigen.  
30 In contrast, both plasmid-free W3110 cells and W3110 cells carrying empty pMW07  
31 plasmid showed little to no cross reactivity. A similar lack of cross reactivity was observed

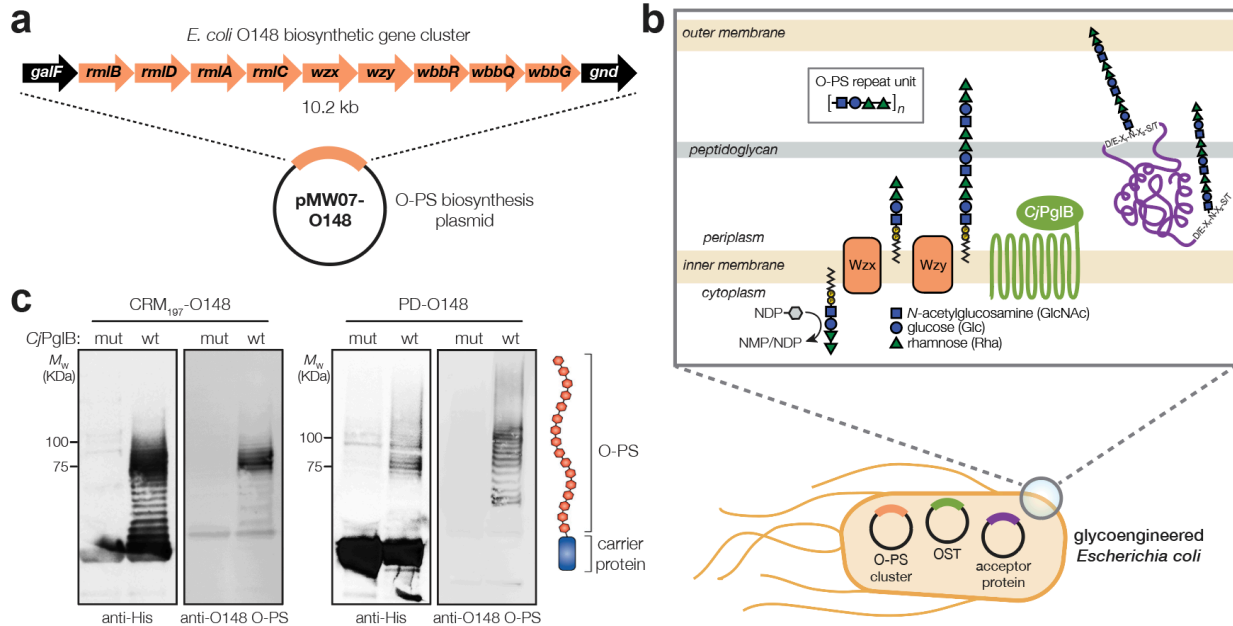

1  
2 **Figure 1. Biosynthesis of glycoconjugate vaccine candidates against ETEC bacteria.** (a) Biosynthesis  
3 of ETEC O148 O-PS from plasmid pMW07-O148, which encodes the entire O-PS locus from ETEC strain  
4 B7A (serotype O148:H28) between *galF* and *gnd*. (b) Glycoconjugate biosynthesis is enabled by  
5 combining engineered O-antigen biosynthesis with *N*-linked protein glycosylation by *C. jejuni* PgIB  
6 (*CjPgIB*). Several plasmid-encoded glycosyltransferases sequentially add the repeat-unit sugars to the  
7 lipid carrier undecaprenol pyrophosphate in the cytoplasmic membrane. The lipid-linked  
8 oligosaccharide is flipped by Wzx and polymerized by the Wzy polymerase, and subsequently  
9 transferred to 'DQNAT' acceptor sites in the carrier protein by PgIB. Deletion of *waaL* in the host strain  
10 is used to eliminate transfer of the O-PS to lipid A-core and ensure efficient transfer to the acceptor  
11 protein, while deletion of *lpxM* results in pentaacylated lipid A structure having significantly reduced  
12 toxicity. (c) Immunoblot analysis of purified carrier proteins derived from *E. coli* CLM24 cells carrying a  
13 plasmid encoding either CRM<sub>197</sub><sup>4xDQNAT</sup> or PD<sup>4xDQNAT</sup> along with plasmid pMW07-O148 encoding the ETEC  
14 O148 O-PS biosynthetic pathway and plasmid pMAF10 encoding wild-type *CjPgIB* (wt) or an inactive  
15 mutant of *CjPgIB* (mut) as indicated. Blots were probed with anti-His antibody to detect acceptor proteins  
16 and anti-ETEC O148 antibody to detect O-PS. Images depict aglycosylated and multiply glycosylated forms  
17 of CRM<sub>197</sub><sup>4xDQNAT</sup> or PD<sup>4xDQNAT</sup>. Molecular weight (*M<sub>w</sub>*) markers are indicated on the left. Results are  
18 representative of three biological replicates.

19  
20 for CLM24 cells, which have a deletion in the *waaL* gene, confirming that the recombinant  
21 O-PS antigen was assembled via the canonical lipid A-core pathway.

22 **Glycosylation of licensed vaccine carrier proteins with ETEC O148 O-PS.** To  
23 generate a strong IgG response and lasting immunity, it is desirable to employ a highly  
24 immunogenic protein as a carrier for the polysaccharide antigen, in this case ETEC  
25 serogroup O148 O-PS. To this end, we sought to engineer non-pathogenic *E. coli* with  
26 the ability to glycosylate a set of carrier proteins, namely PD and CRM<sub>197</sub>, that are  
27 currently used in licensed conjugate vaccines (**Fig. 1b**). To enable conjugation of O-PS  
28 antigens to these carrier proteins, both were modified at their C termini with four tandem



1 repeats of an optimized bacterial glycosylation motif, DQNAT<sup>32</sup>, followed by a 6x-His tag  
2 to enable detection via Western blot analysis and purification by Ni-NTA chromatography.  
3 A signal peptide sequence derived from the *E. coli* DsbA protein was fused to the N-  
4 terminus to localize CRM<sub>197</sub> and PD to the periplasm in a manner that is compatible with  
5 N-linked glycosylation<sup>33</sup>. Each of the resulting plasmids, pTrc99A-CRM<sub>197</sub><sup>4xDQNAT</sup> and  
6 pTrc99A-PD<sup>4xDQNAT</sup>, were used to transform *E. coli* strain CLM24 carrying plasmid  
7 pMW07-O148 that encoded the O-PS biosynthetic enzymes and plasmid pMAF10 that  
8 encoded CjPglB<sup>26</sup>. CLM24 cells were used because they have a deletion of the gene  
9 encoding the WaaL O-antigen ligase that makes undecaprenol pyrophosphate (UndPP)-  
10 linked glycans including O-PS structures exclusively available to CjPglB by preventing  
11 their unwanted transfer to lipid A-core<sup>26</sup>.

12 Following overnight expression of CjPglB along with either CRM<sub>197</sub><sup>4xDQNAT</sup> or  
13 PD<sup>4xDQNAT</sup> in the presence of the ETEC serogroup O148 biosynthetic enzymes, cells were  
14 lysed, and His-tagged carrier proteins were purified by Ni-NTA chromatography. Elution  
15 fractions from each sample were separated by SDS-PAGE and subjected to  
16 immunoblotting using an anti-His antibody to detect the carrier proteins or antiserum  
17 specific for ETEC O148 LPS to detect the O-PS antigen. This analysis revealed that both  
18 CRM<sub>197</sub><sup>4xDQNAT</sup> and PD<sup>4xDQNAT</sup> were readily glycosylated with ETEC O148 O-PS glycans  
19 (**Fig. 1c**). Importantly, we observed a ladder-like banding pattern for both O148 O-PS-  
20 linked carrier proteins (hereafter CRM<sub>197</sub>-O148 and PD-O148), which is characteristic of  
21 CjPglB-mediated O-PS transfer<sup>26</sup> and results from variability in the chain length of O-PS  
22 antigens generated by the Wzy polymerase<sup>19</sup>. The most intense laddering signal was  
23 observed above 75 kDa, suggesting that the carriers were heavily decorated with ETEC  
24 O148 O-PS structures comprised of >10 repeating units (RUs). Control reactions with  
25 CLM24 cells that lacked the O-PS biosynthetic plasmid or expressed a catalytically  
26 inactive CjPglB enzyme, generated by introducing D54N and E316Q substitutions<sup>34</sup>,  
27 confirmed that O-PS conjugation to the carrier proteins depended on both the O-PS  
28 biosynthetic enzymes and CjPglB (**Fig. 1c**; shown for mutant CjPglB).

29 **Immunogenicity of PD-O148 glycoconjugate in mice.** To investigate conjugate  
30 immunogenicity, BALB/c mice were immunized subcutaneously (s.c.) with glycosylated  
31 PD bearing the ETEC O148 O-PS antigen and serum from these animals was analyzed

1 by enzyme-linked immunosorbent assay (ELISA) to determine antibody titers. BALB/c  
2 mice were immunized with 50 µg doses of protein, either PD alone or PD-O148 conjugate,  
3 adjuvanted with aluminium phosphate, and subsequently injected with identical booster  
4 doses at 21 and 42 days after the initial injection (**Fig. 2a**). Upon analyzing sera collected  
5 on day 56, we found that BALB/c mice receiving the PD-O148 conjugate produced high  
6 titers of IgG antibodies that specifically recognized LPS derived from ETEC strain B7A  
7 (**Fig. 2b**). These serum IgG levels were significantly elevated (~2 orders of magnitude)  
8 compared to the titers measured in sera of control mice receiving buffer or aglycosylated  
9 PD. The ability of the PD-O148 conjugate to elicit strong IgG titers against ETEC B7A  
10 LPS provides further validation for using non-pathogenic *E. coli* strains engineered with  
11 protein glycosylation machinery as hosts for conjugate vaccine production.

12 **Functionality of ETEC O-PS-specific serum antibodies.** Next, PD-O148 conjugate  
13 vaccine-induced serum antibodies were evaluated for the ability to promote complement-  
14 mediated killing of ETEC strain B7A by serum bactericidal assay (SBA). SBA is an  
15 established method by which the activity of IgGs against bacterial pathogens can be  
16 measured. It often correlates with protection for serotypes of a pathogen and is a key *in*  
17 *vitro* method for measuring the functional activity of antibodies<sup>35</sup>. Of relevance here,  
18 several groups have developed bactericidal assays for evaluating whether serum IgG  
19 antibodies can potentiate the killing of different ETEC strains<sup>36, 37</sup>. Using a similar  
20 methodology, we investigated the idea that O-PS-specific serum IgGs elicited by the PD-  
21 O148 glycoconjugate would bind to the corresponding LPS on the surface of ETEC strain  
22 B7A and, in the presence of components of the human complement system, would  
23 mediate bacteriolysis of the enteric pathogen. For the sera derived from mice vaccinated  
24 with the PD-O148 conjugate, ~50% survival of ETEC B7A cells (corresponding to ~50%  
25 killing activity) was observed at dilutions as high as 10-fold (**Fig. 2c**). In contrast, virtually  
26 no killing was observed for sera derived from mice treated with PBS or the aglycosylated  
27 PD carrier protein as evidenced by pathogen survival that was close to 100%.  
28 Additionally, near complete killing was observed for the undiluted sera of vaccinated mice,  
29 whereas no killing was observed for the PBS and aglycosylated PD groups at the same  
30 serum dilution. These results confirm the immunological functionality of PD-O148  
31 conjugate vaccine-induced IgGs present in the sera of immunized mice and predict the



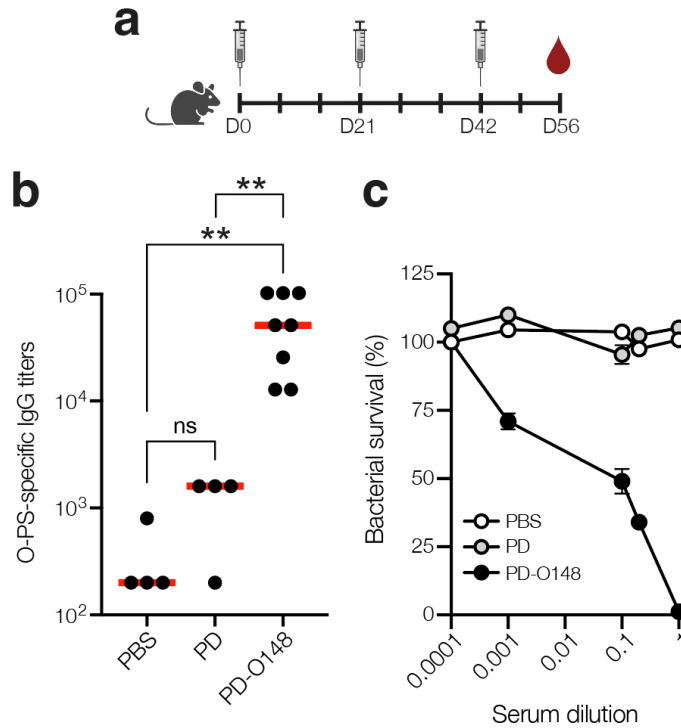

1  
2 **Figure 2. Glycoconjugates are immunogenic.** (a) Schematic of the prime-boost immunization schedule.  
3 Mice received an initial injection on day 0 and identically formulated booster injections on days 21 and 42.  
4 Blood was drawn on days 0, 35, 49, and at study termination on day 56. (b) O-PS-specific IgG titers in day  
5 56 serum of individual mice (black circles) and mean titers of each group (red lines) as determined by ELISA  
6 with LPS derived from ETEC strain B7A (serotype O148:H28) as immobilized antigen. Groups of three  
7 BALB/c mice were immunized s.c. with 100  $\mu$ L PBS alone or PBS containing 50  $\mu$ g of either aglycosylated  
8 PD carrier protein or glycosylated ETEC O148 conjugate (PD-O148) adjuvanted with aluminium  
9 phosphate adjuvant. Mice were boosted on days 21 and 42 with identical doses of each immunogen.  
10 Statistical significance was determined by unpaired *t* test with Welch's correction (*p* < 0.05; \*\**p* < 0.01;  
11 ns, not significant). (c) Bactericidal killing activity of antibodies in the serum of mice immunized with  
12 PBS, unmodified PD carrier protein, or ETEC O148 conjugate (PD-O148). Survival data were derived  
13 from a standard SBA where dilutions of serum from immunized mice were tested against ETEC strain  
14 B7A (serotype O148:H28) in the presence of human complement. SBA curves were generated with  
15 pooled sera from each group. Data are the mean of three biological replicates  $\pm$  SEM.  
16 efficacy and protectiveness of our glycoengineered vaccine candidate.

17 **Protective efficacy of PD-O148 glycoconjugate in mice.** Encouraged by the SBA  
18 results, we tested the ability of the PD-O148 conjugate to protect mice in a murine model  
19 of an orally administered ETEC B7A infection. A major hurdle in developing enteric  
20 vaccines is the lack of a suitable small animal model to study the efficacy and  
21 immunogenicity of potential ETEC vaccines prior to testing in larger animals or humans.  
22 Nevertheless, ETEC infection is commonly induced by the pathogen via oral  
23 administration, with mice becoming colonized with ETEC following oral challenge using  
24 inocula as small as 10<sup>3</sup> colony-forming units (CFUs)<sup>38</sup>. Oral gavage was selected as an  
25 infection model as it closely reflects the route of infection and potentially recapitulates

1 relevant outcomes of ETEC infection seen in humans <sup>39</sup>. In this study, mice were  
2 pretreated with the antibiotic streptomycin, allowing them to more closely mimic the  
3 disease symptoms that are often seen in humans <sup>39,40</sup>. Following immunization according  
4 to an identical schedule as above, mice were infected by oral gavage with  $\sim 1 \times 10^4$  CFUs  
5 of ETEC strain B7A (**Fig. 3a**). After challenge infection, mice were monitored for signs  
6 and symptoms of enteric illness (e.g., water diarrhea). Diarrhea induced by ETEC  
7 infection was greatly reduced in the PD-O148-vaccinated group overall three days post-  
8 infection, which was in stark contrast to buffer and aglycosylated PD control groups that  
9 developed watery diarrhea. We also collected stool samples to detect shedding of the  
10 challenge strain. Diarrheal illness, when it occurs, is associated with higher fecal shedding  
11 levels of ETEC in animals and humans <sup>39, 41</sup>. Post-challenge shedding levels of the  
12 challenge strain ETEC B7A was detected using quantitative PCR (qPCR) to examine  
13 fecal pellet DNA extracts for the presence of LT encoded by the *eltA* gene. Consistent  
14 with the observed protection against diarrhea, only mice receiving the PD-O148 conjugate  
15 exhibited a significant reduction in ETEC stool shedding detected at day 3 post-infection  
16 ( $\sim 2$ -log reduction compared to the buffer and aglycosylated PD carrier protein control  
17 groups) (**Fig. 3b**). Taken together, these results clearly demonstrated the ability of the  
18 PD-O148 conjugate vaccine candidate to confer protection against ETEC infection in  
19 mice, consistent with the conjugate's ability to stimulate high titers of IgG antibodies that  
20 possess potent bactericidal activity.

### 21 **Biosynthesis and immunogenicity of an ETEC serogroup O78-directed conjugate.**

22 As a first step towards such a multivalent formulation, we sought to create a  
23 glycoconjugate vaccine candidate against ETEC serogroup O78 by implementing an  
24 identical strategy as outlined above for serogroup O148. We chose serogroup O78  
25 because it is one of the most widely distributed and most frequently occurring ETEC  
26 serogroups that, together with ETEC serogroups O6, O8, O27, O148, O153 and O169,  
27 accounts for nearly 25% of the nearly 1,000 isolated identified worldwide <sup>20</sup>. Introduction  
28 of plasmid pMW07-O78 <sup>27, 29, 42</sup> (**Supplementary Fig. 2a**) into non-pathogenic *E. coli*  
29 strain W3110 enabled expression of cell-surface O78 O-PS molecules that were readily  
30 detected by dot blot analysis (**Supplementary Fig. 1b**). By combining plasmid pMW07-  
31 O78 together with the plasmids for expressing CjPglB and the CRM<sub>197</sub> carrier protein in

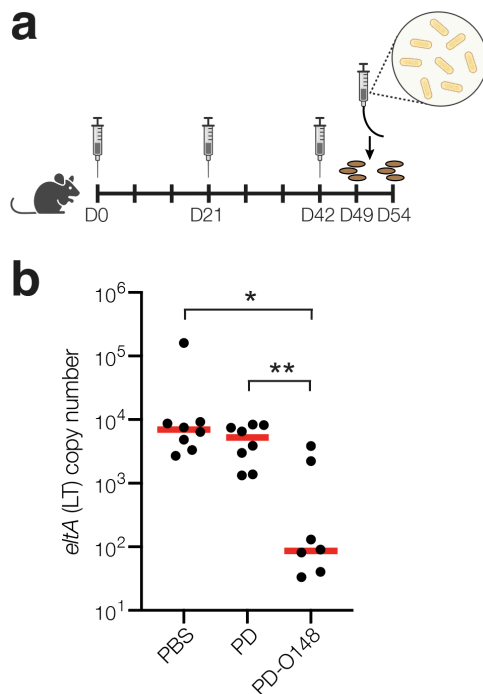

1  
2 **Figure 3. Glycoconjugates are functional and protective.** (a) Schematic of the immunization and  
3 challenge schedule. Mice received an initial immunogen injection on day 0 and identically formulated  
4 booster injections on days 21 and 42. On day 49, mice received antibiotics in the drinking water to eradicate  
5 normal flora and fecal pellets were collected. On day 51, mice were subsequently infected by gavage and  
6 checked daily for 3 days. On day 54, fecal pellets were collected, and mice were sacrificed. (b) Vaccine  
7 effects on stool shedding of ETEC B7A in infected mice 3 days post-infection. Groups of 8 BALB/c  
8 mice receiving PBS, unmodified PD carrier protein, or PD-O148 were infected with  $\sim 1 \times 10^4$  CFUs of  
9 ETEC B7A. Fecal samples were collected for DNA extraction and analyzed by qPCR to detect  
10 pathogen. ETEC burden in fecal pellets was measured by qPCR of the *eltA* gene, which encodes heat-  
11 labile endotoxin (LT). Data are the mean (red bars) of individual mice (black circles). Statistical  
12 significance was determined by unpaired *t* test with Welch's correction ( $*p < 0.05$ ;  $**p < 0.01$ ).  
13

14 CLM24  $\Delta p_{xM}$  cells, we were able to produce glycosylated CRM<sub>197</sub> bearing the O78 O-  
15 PS antigen (**Supplementary Fig. 2b**). The glycosylated CRM<sub>197</sub>-O78 conjugate was used  
16 to immunize BALB/c mice and was observed to induce high titers of IgG antibodies that  
17 specifically recognized LPS derived from ETEC strain H10407 (serotype O78:H11) <sup>43</sup>  
18 (**Supplementary Fig. 2c**). Collectively, these results highlight the modularity of the  
19 biosynthetic approach, enabling facile production of an additional serogroup-specific  
20 conjugate simply by swapping out the O-PS biosynthesis plasmid. Such  
21 interchangeability will be key to generating a multivalent conjugate formulation that  
22 confers broad ETEC serogroup protection, with the results here representing an important  
23 first step in that direction.

1 **Cell-free biosynthesis of ETEC O78 O-PS conjugate.** In parallel to using living cells,  
2 we also explored whether a cell-free protein synthesis (CFPS) approach could be used  
3 to produce glycoengineered conjugate vaccine candidates against ETEC. To this end, we  
4 leveraged a modular technology for *in vitro* conjugate vaccine expression (iVAX) in  
5 portable, freeze-dried lysates from detoxified, non-pathogenic *E. coli*<sup>27</sup> (**Fig. 4a**). Previous  
6 studies demonstrated that iVAX reactions are capable of synthesizing clinically relevant  
7 doses of protective conjugate vaccines comprised of pathogen-specific O-PS antigens  
8 linked to licensed carrier proteins. Here, we produced an iVAX lysate from *E. coli* CLM24  
9  $\Delta/pxM$  cells expressing the ETEC O78 O-PS biosynthetic pathway and CjPglB. This  
10 lysate, which contained lipid-linked ETEC O78 O-PS and active CjPglB, was used to  
11 catalyze iVAX reactions primed with plasmid DNA encoding the PD<sup>4xDQNAT</sup> carrier protein.  
12 The products of these reactions were immunoblotted with anti-His antibody or a  
13 commercial anti-ETEC O78 antibody specific to the ETEC O78 O-PS. Similar to cell-  
14 based expression, cell-free iVAX reactions produced PD<sup>4xDQNAT</sup> that was clearly  
15 glycosylated with the O78 O-PS antigen and exhibited the characteristic ladderlike  
16 banding pattern associated with O-PS chain-length variability (**Fig. 4b**). Control reactions  
17 with lysates from cells lacking the ETEC O78 O-PS were devoid of any detectable  
18 glycosylation. Following immunization of BALB/c mice with the iVAX-derived conjugate,  
19 we observed strong induction of IgG antibodies that specifically recognized LPS derived  
20 from ETEC strain H10407 (serotype O78:H11) (**Fig. 4c**), with serum IgG titers comparing  
21 favorably to those observed following immunization with the CRM<sub>197</sub>-O78 conjugate that  
22 was made in living cells. Finally, PD-O78 conjugate vaccine-induced serum antibodies  
23 were evaluated for the ability to promote complement-mediated killing of ETEC strain  
24 H10407 by SBA. Greater than ~50% killing activity of ETEC H10407 cells was observed  
25 for the sera derived from PD-O78-vaccinated-mice at dilutions as high as 10-fold,  
26 whereas no measurable killing was observed for sera derived from mice treated with PBS  
27 or aglycosylated PD (**Fig. 4d**).

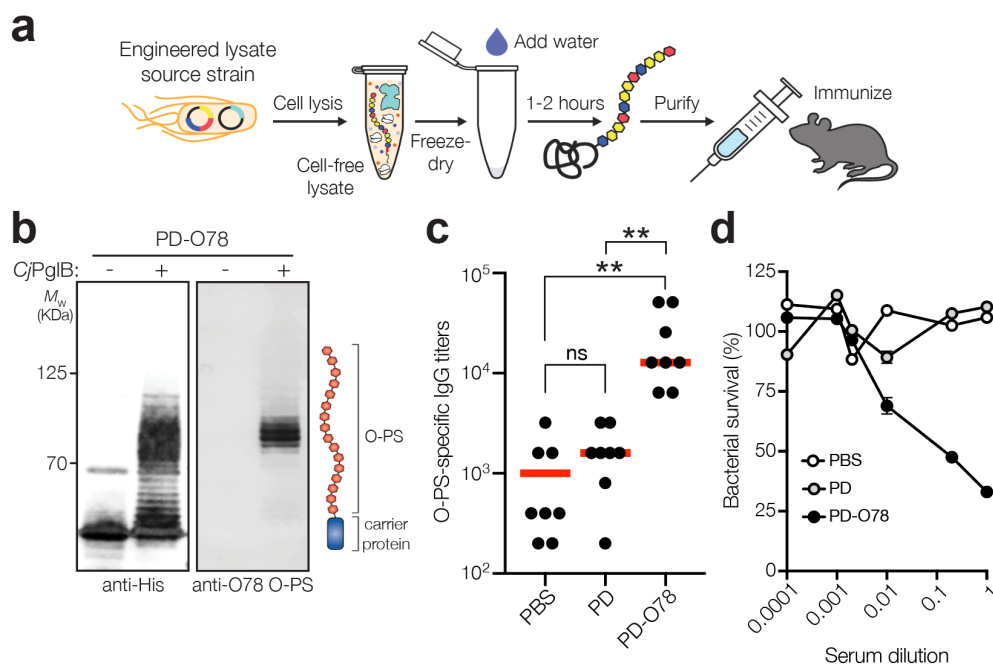

1  
2 **Figure 4. Glycoconjugates are functional and protective.** (a) The iVAX platform provides a rapid  
3 means to develop and distribute conjugate vaccines against bacterial pathogens. (b) Immunoblot analysis  
4 of PD<sup>4xDQNAT</sup> generated using iVAX lysate. Specifically, 5-mL reactions with glyco-enriched S12 extract  
5 derived from CLM24  $\Delta$ *pxM* cells carrying pMW07-O78 and pSF-CjPglB-LpxE were primed with plasmid  
6 pJL1-PD<sup>4xDQNAT</sup>. Blots were probed with anti-His antibody to detect acceptor proteins and anti-ETEC  
7 O78 antibody to detect O-PS antigens. Images depict aglycosylated and multiply glycosylated forms  
8 of PD<sup>4xDQNAT</sup>. Molecular weight ( $M_w$ ) markers are indicated on the left. Results are representative of  
9 three biological replicates. (c) O-PS-specific IgG titers in day 56 serum of individual mice (black circles)  
10 and mean titers of each group (red lines) as determined by ELISA with LPS derived from ETEC strain  
11 H10407 (serotype O78:H11) as immobilized antigen. Groups of three BALB/c mice were immunized s.c.  
12 with 100  $\mu$ L PBS alone or PBS containing 24  $\mu$ g of either aglycosylated PD carrier protein or  
13 glycosylated ETEC O148 conjugate adjuvanted with aluminium phosphate adjuvant. Mice were  
14 boosted on days 21 and 42 with identical doses of each immunogen. Statistical significance was  
15 determined by unpaired *t* test with Welch's correction ( $*p < 0.05$ ;  $**p < 0.01$ ; ns, not significant). (d)  
16 Bactericidal killing activity of serum antibodies from mice immunized with same immunogens as in (c).  
17 Survival data were derived from a standard SBA where serum dilutions were tested against ETEC  
18 strain H10407 in the presence of human complement. SBA curves were generated with pooled sera  
19 from each group. Data are the mean of three biological replicates  $\pm$  SEM.

## 20 DISCUSSION

22 In the present study, we describe robust cell-based and cell-free bioconjugation strategies  
23 for producing conjugate vaccine candidates against two widespread O serogroups of  
24 ETEC, O148 and O78<sup>20</sup>. These strategies leveraged glycoengineered strains of non-  
25 pathogenic *E. coli* and their cell-free extracts for site-specific installation of two different  
26 ETEC O-PS structures onto the PD and CRM<sub>197</sub> carrier proteins that are used in licensed  
27 vaccines. The resulting PD- and CRM<sub>197</sub>-based conjugates were strongly immunogenic  
28 in mice, eliciting high titers of O-PS-specific IgG antibodies that also exhibited potent

1 bactericidal activity against ETEC strains B7A (serotype O148:H28) and H10407  
2 (serotype O78:H11). In proof-of-concept challenge studies, mice vaccinated with the PD-  
3 O148 conjugate were protected against ETEC infection as evidenced by the lack of overt  
4 water diarrhea and significantly decreased ETEC stool shedding. Overall, our findings  
5 expand the repertoire of available ETEC antigens to include molecules that have largely  
6 been overlooked for subunit vaccine engineering. Moreover, the cell-based and cell-free  
7 platforms described here lay the foundation for future creation of a custom, multivalent  
8 vaccine with the potential for broad ETEC coverage and increased access through  
9 adoption of simplified, low-cost biomanufacturing platforms.

10         The immunogenicity and protective efficacy of our conjugates substantiate the use  
11 of ETEC O-PS as a subunit vaccine antigen. This antigenic expansion is significant for  
12 several reasons. First, even though glycoconjugate vaccines are one of the safest and  
13 most effective methods for preventing bacterial infections, there are surprisingly few that  
14 have been fully licensed. That said, these numbers are poised to increase in the coming  
15 years as cell-based and cell-free technologies for glycoengineering recombinant  
16 vaccines, such as those described here and elsewhere,<sup>25</sup> reach full maturity. As part of  
17 this maturation, it is imperative to continue growing the pipeline with as many promising  
18 anti-bacterial vaccine candidates as possible, especially as diarrheal and other vaccine-  
19 preventable diseases continue to be unmet challenges and as drug-resistant bacteria are  
20 predicted to threaten up to 10 million lives per year by 2050<sup>44</sup>. Second, all ETEC vaccines  
21 to enter clinical testing thus far are focused on the classical paradigm of ETEC  
22 pathogenesis and attempt to induce immune responses to select colonization factor  
23 (CF/CS) antigens and LT<sup>8-11</sup>. However, the risk of focusing on the classical paradigm is  
24 that it constrains ETEC vaccinology to a subset of canonical antigens, which could be  
25 problematic if our current view of ETEC pathogenesis is incomplete, as has been  
26 suggested recently<sup>10</sup>. For this reason, we decided to investigate O-PS from ETEC  
27 serogroups O148 and O78 with the goal of validating these non-canonical targets and  
28 supplementing the existing inventory of ETEC vaccine antigens. One potential drawback  
29 of O-PS as an ETEC vaccine target is the fact there are more than 78 O serogroups.  
30 Fortuitously, however, as few as 10 serogroups (O6, O8, O9, O25, O27, O78, O128,  
31 O148, O153 and O159) account for >75% of known ETEC isolates<sup>20</sup>, suggesting that a



1 10-valent conjugate vaccine could afford broad protection. This number is much more  
2 feasible for multivalent ETEC vaccine development, especially considering that some of  
3 the most effective licensed conjugates achieve a valency of >10 by attachment of distinct  
4 polysaccharides from the most important serogroups (e.g., Prevnar13, Prevnar20). It is  
5 also worth noting that multivalency is not a unique challenge for an O-PS-based vaccine.  
6 There are 25 distinct CF/CS antigens identified to date that would need to be combined  
7 in some manner in order to achieve ~75% coverage of all isolates expressing the most  
8 common colonization factors<sup>10</sup>. Hence, both O-PS and protein antigen-based vaccine  
9 candidates face complicated paths to a broadly protective, multivalent vaccine.

10 The ETEC O148 and O78 structures are now part of an ever-expanding list of  
11 polysaccharides that can be transferred to acceptor proteins by the CjPglB biocatalyst.  
12 CjPglB is well known for its remarkably relaxed oligosaccharide substrate specificity that  
13 allows transfer of diverse Und-PP-linked glycans including numerous different O-PS  
14 structures<sup>26, 45</sup>. The ability of CjPglB to site-specifically modify diverse acceptor proteins  
15 is aided by the introduction of a genetically encoded *N*-linked glycosylation tag that can  
16 be appended N- or C-terminally in single or multiple copies, or can be inserted at internal  
17 locations in the acceptor protein<sup>33</sup>. Here, the introduction of four tandemly repeated  
18 DQNAT motifs at the C-termini of CRM<sub>197</sub> and PD facilitated their use as acceptor protein  
19 substrates for CjPglB and significantly expanded the set of carrier proteins available for  
20 bioconjugation, which historically has focused on a narrow set of carriers that are not  
21 currently used in any licensed vaccines – most notably *Pseudomonas aeruginosa*  
22 exotoxin A (ExoA)<sup>25</sup>. Importantly, the in-built flexibility of bacterial OSTs like CjPglB  
23 together with programmable glycosylation motifs makes it straightforward to produce an  
24 array of custom vaccines comprised of different polysaccharide/protein combinations.

25 As mentioned above, manufacturing of traditional conjugate vaccines is a complex,  
26 multistep process that is expensive, time consuming, and low yielding<sup>24</sup>. The Centers for  
27 Disease Control and Prevention (CDC) cost per dose for conjugate vaccines ranges from  
28 ~\$9.50 for the *H. influenzae* vaccine ActHIB up to ~\$75 and ~\$118 for the meningococcal  
29 vaccine Menactra and pneumococcal vaccine Prevnar 13, respectively<sup>46</sup>. The cell-based  
30 and cell-free strategies described here represent greatly simplified alternatives for  
31 biomanufacturing conjugate vaccines whereby metabolically engineered *E. coli* or their

1 cell-free extracts are exploited for one-step production of an unlimited and renewable  
2 supply of pure conjugate vaccine product. Because of the dramatic simplification of the  
3 process, bioconjugation strategies are anticipated to allow scalable production of large  
4 quantities of conjugates at a much more affordable cost, which is especially important for  
5 achieving sustained impact on global public health. For large-scale *E. coli*-based  
6 production, recent technoeconomic analysis indicates that the manufacturing costs (costs  
7 of goods sold, COGS) for a biologic antiviral, Griffithsin (GRFT), are as low as \$3.43/g  
8 assuming production of >24,000 kg GRFT/yr<sup>47</sup>. These authors concluded that, based on  
9 an estimated dose of 12–24 mg, it would be possible to provide ~1 billion doses/yr at a  
10 COGS of about \$0.08/dose. While economics for a conjugate vaccine would be different  
11 due to the smaller dose and need for fewer total doses overall, we anticipate that a large-  
12 scale, *E. coli*-based manufacturing process for conjugates would offer a highly  
13 competitive cost per dose. Likewise, our own economic analysis of cell-free production  
14 revealed that iVAX reactions are inexpensive, costing ~\$5/mL for raw materials. This cost  
15 can be decreased by approximately four-fold to ~\$1.40/mL (~\$0.50 per 24 µg dose) by  
16 optimizing the cell-free extract formulation to use the low-cost energy substrate  
17 maltodextrin in place of the significantly more expensive phosphorylated secondary  
18 energy substrate phosphoenolpyruvate (PEP)<sup>42</sup>. Additional advantages of cell-free  
19 systems for conjugate production include that they can be: (i) distributed through freeze  
20 drying<sup>48</sup> followed by simple rehydration at the point of use<sup>27, 49</sup>; (ii) linearly scaled from 1  
21 nL to 100 L<sup>50</sup> for accelerated process development; and (iii) rapidly customized and  
22 reconfigured for product switching<sup>49, 51</sup>. Taken together, these features have the potential  
23 to advance new paradigms in decentralized manufacturing of conjugate vaccines that we  
24 are continuing to explore for ETEC and other high-priority pathogens.

25

## 26 **MATERIALS AND METHODS**

27 **Bacterial strains and plasmids.** All strains used in this study are provided in  
28 **Supplementary Table 1.** Briefly, *E. coli* strain DH5α was used for all molecular biology  
29 including plasmid cloning and isolation. *E. coli* W3110 was used for expressing O-PS on  
30 lipid A-core and displaying O-PS molecules on the cell surface while *E. coli* CLM24<sup>26</sup> was  
31 used as the host strain for expressing glycoengineered conjugates using intact cells.

1 CLM24 is a derivative of W3110 that carries a deletion in the gene encoding the WaaL  
2 ligase, thus facilitating the accumulation of preassembled glycans on Und-PP as  
3 substrates for CjPglB-mediated protein glycosylation. CLM24  $\Delta$ *lpxM* was used as the  
4 source strain for expressing glycoengineered conjugates in cell-free reactions. CLM24  
5  $\Delta$ *lpxM* lacks the gene encoding the lipid A acyltransferase LpxM, a deletion that yields a  
6 pentaacylated lipid A structure with significantly reduced toxicity<sup>52</sup>. The ETEC strains  
7 B7A (serotype O148:H28; CS6, LT, STa)<sup>30</sup> and H10407 (serotype O78:H11; CFA/I, LT,  
8 STa)<sup>43</sup> were used for SBA and challenge studies as well as a source of LPS. These  
9 strains were chosen because both were previously used in human challenge trials<sup>31, 43</sup>.

10 Plasmids used in the study are listed in **Supplementary Table 1**. Briefly, plasmids  
11 pTrc99A-ssDsbA-PD<sup>4xDQNAT</sup> and pTrc99A-ssDsbA-CRM<sub>197</sub><sup>4xDQNAT</sup><sup>27</sup> were used to  
12 express the PD and CRM<sub>197</sub> acceptor proteins in the *E. coli* periplasm. These plasmids  
13 were constructed by PCR amplification of the ssDsbA-PD<sup>4xDQNAT</sup> and ssDsbA-  
14 CRM<sub>197</sub><sup>4xDQNAT</sup> sequences from plasmids pTrc99S-ssDsbA-PD<sup>4xDQNAT</sup> and pTrc99S-  
15 ssDsbA-CRM<sub>197</sub><sup>4xDQNAT</sup>, respectively<sup>27</sup>, and followed by ligation of the PCR products in  
16 pTrc99A. Plasmid sequences were confirmed by Sanger sequencing at the Genomics  
17 Facility of the Cornell Biotechnology Resource Center (BRC). Plasmids pMAF10<sup>26</sup> and  
18 pMAF10<sup>D54N/E316Q</sup><sup>34</sup> were used for cell-based expression of wild-type CjPglB and an  
19 inactive D54N/E316Q mutant of CjPglB, respectively. The bacterial O-PS biosynthetic  
20 pathway plasmids were pMW07-O78<sup>27, 29, 42</sup> for expressing the O-PS of ETEC strain  
21 H10407 and pMW07-O148<sup>28, 29</sup> for expressing the O-PS of ETEC strain B7A. Plasmids  
22 used for cell-free expression of conjugate vaccines included pSF-CjPglB-LpxE for co-  
23 expressing CjPglB along with *Francisella tularensis* phosphatase LpxE that promotes  
24 monophosphorylation of lipid A<sup>27</sup> and pJL1-PD<sup>4xDQNAT</sup> for expressing PD<sup>4xDQNAT</sup><sup>27</sup>.

25 **Cell-based glycoconjugate expression and purification.** For cell-based  
26 glycoconjugate expression, plasmids pTrc99A-ssDsbA-PD<sup>4xDQNAT</sup> and pTrc99A-ssDsbA-  
27 CRM<sub>197</sub><sup>4xDQNAT</sup> encoding conjugate carrier proteins preceded by the DsbA signal peptide  
28 for translocation to the periplasm were used to transform CLM24 cells carrying a bacterial  
29 O-PS pathway encoded on plasmid pMW07-O148 or pMW07-O78 and CjPglB encoded  
30 on plasmid pMAF10 or pMAF10<sup>D54N/E316Q</sup>. Transformed cells were grown in 10 mL LB  
31 medium (10 g/L yeast extract, 5 g/L tryptone, 5 g/L NaCl) overnight at 37 °C. The next

1 day, cells were subcultured into 1 L of LB and allowed to grow at 37 °C until the optical  
2 density at 600 nm (OD<sub>600</sub>) reached 0.6-0.8. The culture was then supplemented with 0.2%  
3 arabinose to induce expression of CjPglB and grown at 30 °C for 16 h, after which 0.5  
4 mM isopropyl-β-D-thiogalactopyranoside (IPTG) was added to induce expression of the  
5 conjugate carrier protein for an additional 8 h at 30 °C. The cells were harvested, and cell  
6 pellets were resuspended in lysis buffer (20 mM Tris-HCl, 200 mM NaCl, 10 mM  
7 imidazole; pH 7.5) at 2-5 mL buffer per gram wet weight. Cells were lysed using a  
8 EmulsiFlex-C5 homogenizer (Avestin) then centrifuged at 13,000 x g for 30 min. The  
9 lysate was filtered through a 0.45-μm syringe filter and loaded onto a gravity flow column  
10 containing Ni-NTA resin (Thermo Fisher Scientific) that was washed with 5-10 column  
11 volumes of wash buffer (20 mM Tris-HCl, 200 mM NaCl, 20 mM imidazole; pH 7.5). The  
12 resin and cell lysate supernatant were allowed to equilibrate for 30 min at 4 °C. After  
13 flowthrough of the supernatant, the resin was washed with 5 column volumes of wash  
14 buffer. The protein was eluted with 3 column volumes of elution buffer (20 mM Tris-HCl,  
15 200 mM NaCl, 300 mM imidazole; pH 7.5). Eluted protein was dialyzed into sterile PBS,  
16 concentrated, and quantified measured by Bradford assay.

17 **Periplasmic extract preparation.** Periplasmic extracts containing the expressed  
18 glycoproteins were prepared by centrifuging the induced cultures at 13,000 x g and 4 °C  
19 for 2 min. The resulting pellets were resuspended in 0.4 M L-arginine (Sigma-Aldrich; 100  
20 μL 0.4 M L-arginine per 100 mL culture) and incubated at 4 °C for 1 h with gentle shaking  
21 at 10-min intervals. The resuspended pellets were then centrifuged as above to obtain  
22 the final periplasmic extracts in the supernatant.

23 **Cell-free extract preparation.** Cell-free extracts were prepared as previously described  
24 <sup>42, 53</sup>. Specifically, CLM24 Δ*pxM* cells were transformed with both pSF-CjPglB-LpxE and  
25 pMW07-O78 plasmids for the strain used to generate PD-O78, and only the pSF-CjPglB-  
26 LpxE plasmid for the strain used to generate the negative control aglycosylated PD. Cells  
27 were grown in a Sartorius Stedim BIOSTAT Cplus bioreactor at the 10-L scale in 2xYTP  
28 media supplemented with carbenicillin at 100 μg/mL and chloramphenicol at 34 μg/ml or  
29 only carbenicillin at 100 μg/mL in the negative control extract . Cells were inoculated at  
30 OD<sub>600</sub> ≈ 0.08 and induced at OD<sub>600</sub> ≈ 1 with 0.02% arabinose to induce expression of  
31 CjPglB and O-PS enzymes and harvested at OD<sub>600</sub> ≈ 3. All subsequent steps were

1 performed on ice unless otherwise stated. Cells were harvested by centrifugation at 5,000  
2 x g for 15 min and then washed 3 times with S30 buffer (10 mM Tris acetate pH 8.2, 14  
3 mM magnesium acetate, and 60 mM potassium acetate). Following washing, cells were  
4 pelleted at 7,000 x g for 10 min, then flash frozen and stored at -80 °C. For lysis, CLM24  
5  $\Delta$ *pxM* cells were resuspended in 1 mL/g S30 buffer then homogenized using an  
6 EmulsiFlex-C3 high-pressure homogenizer (Avestin) with 1 pass at a pressure of ~21,000  
7 psig. Following lysis, cells were centrifuged for 12,000 x g for 10 min. Supernatant was  
8 then collected and incubated at 37°C for 1 h in a runoff reaction. Cells were then  
9 centrifuged once more at 10,000 x g for 10 min and the supernatant was flash frozen and  
10 stored at -80 °C as the final extract.

11 **Cell-free protein synthesis reactions.** For cell-free synthesis of PD-O78 and  
12 aglycosylated PD, reactions were prepared at the 5-mL scale in 50 mL conical tubes.  
13 Reactions producing PD-O78 used extract enriched with both *Cj*PglB and ETEC-O78 O-  
14 PS, while reactions producing aglycosylated PD used extract enriched only with PglB.  
15 Each reaction was prepared as described previously<sup>54</sup> to contain 3.33 ng/ $\mu$ L pJL1-PD-  
16 4xDQNAT plasmid and 30% (vol./vol.%) extract in addition to: 10 mM magnesium  
17 glutamate (Sigma, 49605), 10 mM ammonium glutamate (Biosynth, FG28929), 130 mM  
18 potassium glutamate (Sigma, G1501), 1.2 mM adenosine triphosphate (Sigma A2383),  
19 0.85 mM guanosine triphosphate (Sigma, G8877), 0.85 mM uridine triphosphate (Sigma  
20 U6625), 0.85 mM cytidine triphosphate (Sigma, C1506), 0.034 mg/mL folinic acid,  
21 0.171 mg/mL *E. coli* tRNA (Roche 10108294001), 2 mM each of 20 amino acids, 30 mM  
22 phosphoenolpyruvate (PEP, Roche 10108294001), 0.4 mM nicotinamide adenine  
23 dinucleotide (Sigma N8535-15VL), 0.27 mM coenzyme-A (Sigma C3144), 4 mM oxalic  
24 acid (Sigma, PO963), 1 mM putrescine (Sigma, P5780), 1.5 mM spermidine (Sigma,  
25 S2626), 57 mM HEPES (Sigma, H3375), and 15-20  $\mu$ g/mL T7. Reactions were then  
26 lyophilized for 16-20 hours using a VirTis Benchtop Pro Lyophilizer (SP scientific). Fully  
27 lyophilized reactions were rehydrated with 5 mL nuclease-free water and incubated at  
28 30°C for one hour to synthesize the carrier protein (PD). After one hour of protein  
29 synthesis, glycosylation was initiated by supplementing 25 mM MnCl<sub>2</sub> and 0.1 % wt/vol  
30 DDM. Reactions were incubated for one more hour at 30 °C, then were centrifuged at



1 16,000 x g for 15 minutes. The His-tagged carrier protein was then purified from the  
2 soluble cell-free reactions using Ni-NTA affinity resin as previously described <sup>42</sup>.

3 **Western blot analysis.** Cell-based glycoconjugate samples were run on NuPAGE 4-12%  
4 Bis-Tris gels (Invitrogen). Following electrophoretic separation, proteins were transferred  
5 from gels onto 0.45- $\mu$ m Immobilon-P polyvinylidene difluoride membranes (PVDF) using  
6 a mini blot module (Thermo Fisher Scientific) according to the manufacturer's instructions.  
7 Membranes were washed twice with TBS buffer (80 g/L NaCl, 20 g/L KCl, and 30 g/L Tris-  
8 base) followed by incubation for 1 h in blocking solution (50 g/L non-fat milk in TBS). After  
9 blocking, membranes were washed three times in TBS-T (TBS with 0.05% (v/v%) Tween-  
10 20) with a 5-min incubation between each wash. For fluorescence-based detection of  
11 immunoblots, membranes were probed with both an anti-6x-His tag antibody (R&D  
12 Systems, Cat # MAB050; diluted 1:7,500) and anti-ETEC O148 antibody (Abcam, Cat #  
13 ab78827; diluted 1:1,000) or anti-ETEC O78 antibody (Abcam, Cat # ab78826; diluted  
14 1:1,000) in 1X TBS-T with 5% (w/v) BSA. Probing of membranes was performed overnight  
15 at 4 °C with gentle rocking, after which membranes were washed with TBS-T as described  
16 above and probed with fluorescently labeled secondary antibodies for 1 h at room  
17 temperature in 1X TBS-T with 5% (w/v) nonfat dry milk. The membrane was washed for  
18 5 min with TBS-T and then imaged using a ChemiDoc XRS+System (Bio-Rad). For  
19 chemiluminescence-based detection of immunoblots, membranes were probed with an  
20 anti-6x-His tag antibody (Abcam, Cat # ab9108; diluted 1:7,500) and then with the  
21 corresponding anti-mouse HRP-conjugated secondary antibody (Abcam, Cat #  
22 ab205718; diluted 1:7,500). Another membrane was separately probed with anti-ETEC  
23 O148 antibody (Abcam, Cat # ab78827; diluted 1:1,000) or anti-ETEC O78 antibody  
24 (Abcam, Cat # ab78826; diluted 1:1,000) in 1X TBS-T with 5% (w/v) BSA and then with  
25 anti-rabbit HRP-conjugated secondary antibody (Abcam, Cat # ab205718; diluted  
26 1:7,500). For signal visualization, membranes were briefly incubated at room temperature  
27 with Western ECL substrate (Bio-Rad) and imaged using a ChemiDoc XRS+System (Bio-  
28 Rad).

29 Cell-free samples were run on 4-12% Bis-Tris gels with SDS-MOPS running buffer  
30 supplemented with NuPAGE antioxidant. Samples were then transferred to PVDF 0.45-  
31  $\mu$ m membranes (Millipore, USA) for 55 min at 80 mA per blot using a semi-dry transfer



1 cell. Membranes were blocked for 1 h at room temperature or overnight at 4 °C in Intercept  
2 Blocking Buffer (Licor). Primary antibodies used were anti-His antibody (Abcam, Cat #  
3 ab1187; diluted 1:7,500) or anti-ETEC-O78 antibody (Abcam, Cat # ab78826; diluted  
4 1:2,500) in Intercept blocking buffer with 0.2% (v/v) Tween 20, and membranes were  
5 incubated for 1 h at room temp or overnight at 4 °C. The secondary antibody used was a  
6 fluorescent goat anti-rabbit antibody (Licor, Cat # GAR-680RD; diluted 1:10,000) in  
7 Intercept blocking buffer, 0.2% (v/v) Tween 20 and 0.1% (w/v) SDS for both anti-His and  
8 anti-ETEC-O78 blots. Blots were washed 6 times for 5 min after each of the blocking,  
9 primary, and secondary antibody incubations using PBS-T. Blots were imaged with Licor  
10 Image studio.

11 **Dot blot analysis.** To detect cell-surface expression of ETEC O148 O-PS, overnight  
12 cultures of the following strains were grown: *E. coli* strains W3110 and CLM24 without a  
13 plasmid, W3110 carrying empty pMW07, W3110 and CLM24 carrying pMW07-O148, and  
14 ETEC strain B7A. A total of 2 µl containing an equivalent amount of each strain, as well  
15 as LPS extracted from B7A cells, were spotted onto a nitrocellulose membrane. The  
16 membrane was allowed to dry, and then non-specific sites were blocked by soaking in  
17 5% (w/v) BSA in TBS-T for 1 h at room temperature, followed by incubation for 30 min  
18 with anti-ETEC O148 antibody (Abcam, Cat # ab78827; diluted 1:1,000) in 0.1% (w/v)  
19 BSA in TBS-T. The membrane was washed three times with TBS-T, then incubated with  
20 secondary antibody conjugated to HRP. After three TBS-T washes, the membrane was  
21 incubated with Western ECL substrate (Bio-Rad) and imaged using a ChemiDoc™  
22 XRS+System (Bio-Rad). An identical protocol was followed for detection of cell-surface  
23 expression of ETEC O78 O-PS.

24 **Immunization.** Groups of four 6-week-old female BALB/c mice (Harlan Sprague Dawley)  
25 were immunized s.c. with 50 µL of sterile PBS (pH 7.4, Fisher Scientific) or formulations  
26 containing either aglycosylated PD or PD-O148 conjugate. The amount of antigen in each  
27 preparation was normalized such that ~25-50 µg of these proteins was administered per  
28 injection. The purified protein groups were formulated in sterile PBS and mixed with an  
29 equal volume of Adju-Phos aluminium phosphate adjuvant (InvivoGen) before injection.  
30 Mice were boosted 21 and 42 days after the initial immunization. For antibody titering,  
31 blood was taken on days 0, 35, and 49 via submandibular collection, as well as at the

1 study termination on day 56 via cardiac puncture. Sera were isolated from the collected  
2 blood draws after centrifugation at 5,000 x g for 10 min and stored at -20°C. For bacterial  
3 killing assays, final blood serum collections for all the mice within each group were pooled.  
4 The protocol number for the animal trial was 2012-0132 and was approved by the  
5 Institutional Animal Care and Use Committee (IACUC) at Cornell University.

6 **Serum antibody titering.** Serum antibody titers were determined by ELISA using LPS  
7 derived from ETEC strains as immobilized antigen. Specifically, O148 and O78 LPS  
8 molecules were prepared from ETEC strains B7A and H10407, respectively, by hot  
9 phenol water extraction and DNase I (Sigma) and proteinase K (Invitrogen) treatment, as  
10 described elsewhere <sup>17</sup>. Briefly, extracted LPS samples were purified using PD-10  
11 desalting columns packed with Sephadex G-25 resin (Cytiva), and concentrations were  
12 determined using a purpald assay <sup>55</sup>. 96-well plates (MaxiSorp; Nunc Nalgene) were  
13 incubated with 0.5 µg/mL of purified LPS diluted in PBS, pH 7.4, 25 µL/well, at 4 °C  
14 overnight. Plates were incubated with 50 µL blocking buffer (5% (w/v) nonfat dry milk  
15 (Carnation) in PBS) overnight at 4 °C, then washed three times with 200 µL PBS-T (PBS,  
16 0.05% (v/v) Tween 20) per well. Serum samples isolated from the collected blood draws  
17 of immunized mice were appropriately serially diluted in triplicate in blocking buffer and  
18 added to the plates for 2 h at 37 °C. Plates were washed three times with PBS-T (+ 0.03%  
19 BSA (w/v)), then incubated for 1 h at 37 °C in the presence of a horseradish peroxidase–  
20 conjugated goat anti-mouse IgG antibody (Abcam, Cat # ab97265; diluted 1:25,000).  
21 After three PBS-T + 0.3% BSA washes, 50 µL of 3,3'-5,5'-tetramethylbenzidine substrate  
22 (1-Step Ultra TMB-ELISA; Thermo Fisher Scientific) was added to each well, and the  
23 plates were incubated at room temperature in the dark for 30 min. The reaction was  
24 stopped by adding 50 µL of 2 M H<sub>2</sub>SO<sub>4</sub>, and absorbance was measured at a wavelength  
25 of 450 nm using a FilterMax F5 microplate spectrophotometer (Agilent). Serum antibody  
26 titers were determined by measuring the lowest dilution that resulted in signals that were  
27 3 standard deviations above the background controls of no serum. Statistical significance  
28 was determined by unpaired *t* test with Welch's correction using GraphPad Prism 9 for  
29 MacOS (Version 9.2.0).

30 **SBA.** A modified version of a previously described SBA method was followed <sup>56</sup>. ETEC  
31 B7A cells were grown overnight from a frozen glycerol stock, then seeded 1:20 in LB

1 medium. Log-phase grown bacteria were harvested, adjusted to an OD<sub>600</sub> of 0.1, then  
2 further diluted 1:5,000 in Hanks' Balanced Salt Solution with 0.5% (w/v) BSA (Sigma  
3 Aldrich). Assay mixtures were prepared in 96-well microtiter plates by combining 20 µL of  
4 serially diluted heat-inactivated test serum (dilutions ranging from 10<sup>0</sup>-10<sup>4</sup>), and 10 µL of  
5 diluted bacterial suspension. After incubation with shaking for 60 min at 37 °C, 10 µL of  
6 active or inactive complement source was added to each well, to a final volume percent  
7 of 25% (v/v). Heat-inactivated complement was prepared by thawing an aliquot of active  
8 pooled human complement serum (Innovative Research, ICSE1ML), incubating in a 56  
9 °C water bath for 30 min, and cooling at room temperature. Assay plates were incubated  
10 with shaking at 37 °C for 60–90 min, then 10 µL was plated from each well (diluted to 50  
11 µL in LB) on LB agar plates. Serum samples were tested and plated in duplicate, and  
12 colonies were counted (Promega Colony Counter) after 16–18 h of incubation at 30 °C.  
13 CFUs were counted for each individual serum dilution, and SBA titers were determined  
14 by calculating percent survival at various serum dilutions. Data was plotted as percentage  
15 survival versus serum dilution.

16 **ETEC infection.** Groups of eight 6-week-old female BALB/c mice (Harlan Sprague  
17 Dawley) were immunized s.c. with 50 µL of sterile PBS (pH 7.4, Fisher Scientific) or  
18 formulations containing aglycosylated PD or PD-O148 conjugate, according to the 49-day  
19 immunization schedule described above. At 7 days post-vaccination (48 h prior to  
20 challenge infection), mice received streptomycin (5 g/L) and fructose (6.7% (w/v)) in the  
21 drinking water to eradicate normal flora and fecal pellets were collected. Food was  
22 withheld 12 h prior to challenge infection and replaced with sterile water without  
23 antibiotics. Famotidine (50 mg/kg) (Sigma-Aldrich) was then administered 2 h prior to  
24 challenge infection to neutralize gastric acid. At 9 days post-vaccination, mice were  
25 subsequently infected with a 200-µL inoculum containing ~1×10<sup>4</sup> CFU of ETEC strain  
26 B7A, administered by gavage with a feeding needle directly introduced in the stomach via  
27 the esophagus. After challenge infection, mice were checked daily for 3 days, and fecal  
28 pellets were collected and stored at -20°C for further analysis. Mice were sacrificed 72 h  
29 post-infection. All procedures were carried out in accordance with protocol 2012-0132  
30 approved by the Cornell University Institutional Animal Care and Use Committee.

1 **Quantitative real-time PCR analysis of ETEC burden.** DNA from fecal pellets of  
2 individual mice was extracted from thawed stool samples using a QIAamp DNA stool kit  
3 (Qiagen) following the manufacturer's instructions. To enhance extraction of pathogen  
4 DNA, stool samples were first vigorously homogenized with ~300 mg of 1.0-mm-diameter  
5 zirconia beads (Bio Spec) using a Mini-Bead Beater (BioSpec). After extraction, DNA was  
6 eluted in elution buffer and stored at -20°C. Stool DNA and tissue were analyzed for the  
7 ETEC B7A-specific heat-labile enterotoxin LT encoded by the *eltA* gene to determine the  
8 levels of shedding of the organism in stool. Quantification of ETEC was performed by  
9 qPCR using Taq DNA polymerase, as described elsewhere<sup>57, 58</sup>, using the following  
10 conditions: preheating at 95 °C for 5 min, denaturation at 95 °C for 30 s, annealing at 58  
11 °C for 30 s, elongation at 72 °C for 1 min. PCR was performed for 55-60 cycles for  
12 maximal saturation of signal with final extension at 72 °C for 7 min in a 7500 Fast Real-  
13 Time PCR System (Applied Biosystems). The primer sequences used were: *eltA* forward  
14 5'- TTCCCACCGGATCACCAA -3' and *eltA* reverse 5'-CAACCTTGTGGTGCATGATGA  
15 - 3', along with a custom Taqman Probe (Thermo Fisher Scientific) 5'-  
16 CTTGGAGAGAAGAACCCT-3' labeled with FAM (6-carboxyfluorescein) at the 5' end and  
17 MGB at the 3' end. Reactions with no DNA template were also included as controls.  
18 Reaction components were combined in MicroAmp 96-well reaction plates (Applied  
19 Biosystems) and plates were centrifuged at ~500 x g for 1 min before each reaction.

20 **Statistical analysis and reproducibility.** To ensure robust reproducibility of all results,  
21 experiments were performed with at least three biological replicates and at least three  
22 technical measurements. Sample sizes were not predetermined based on statistical  
23 methods but were chosen according to the standards of the field (at least three  
24 independent biological replicates for each condition), which gave sufficient statistics for  
25 the effect sizes of interest. All data were reported as average values with error bars  
26 representing standard error of the mean (SEM). Statistical significance was determined  
27 by unpaired *t* test with Welch's correction ( $*p < 0.05$ ,  $**p < 0.01$ ; ns, not significant). All  
28 graphs were generated using Prism 9 for MacOS version 9.2.0. No data were excluded  
29 from the analyses. The experiments were not randomized. The Investigators were not  
30 blinded to allocation during experiments and outcome assessment.

31

1 **Acknowledgements.** This work was supported by the Bill and Melinda Gates Foundation  
2 (OPP1217652 to M.P.D. and M.C.J.), the Defense Threat Reduction Agency (grants  
3 HDTRA1-15-10052 and HDTRA1-20-10004 to M.P.D. and M.C.J.), and the National  
4 Science Foundation (grant CBET-1605242 to M.P.D. and grants CBET-1936823 and  
5 MCB-1413563 to M.P.D. and M.C.J.). A.J.W. was supported by a Cornell Presidential  
6 Postdoctoral Fellowship and K.F.W. was supported by the National Defense Science and  
7 Engineering (NDSEG) Fellowship Program (ND-CEN-013-096) sponsored by the Army  
8 Research Office.

9

## 10 **Author Contributions.**

11 Conceptualization: A.J.W., K.F.W., M.C.J., Y.-F.C. and M.P.D.

12 Methodology: A.J.W., P.D., K.F.W., J.L., J.-J.L., D.A.W., S.E.S. and Y.-F.C.

13 Investigation: A.J.W., P.D., K.F.W., J.L., J.-J.L., D.A.W., S.E.S. and Y.-F.C.

14 Visualization: M.P.D.

15 Supervision: M.C.J., Y.-F.C. and M.P.D.

16 Writing - original draft: A.J.W. and M.P.D.

17 Writing - review & editing: A.J.W., P.D., K.F.W., M.C.J., Y.-F.C. and M.P.D.

18

19 **Competing Interests Statement.** M.P.D. and M.C.J. have financial interests in Gauntlet,  
20 Inc. and Resilience, Inc. M.P.D. has financial interests in Glycobia, Inc., MacImmune, Inc.,  
21 UbiquiTX, Inc., and Versatope Therapeutics, Inc. M.P.D.'s and M.C.J.'s interests are  
22 reviewed and managed by Cornell University and Northwestern University, respectively,  
23 in accordance with their conflict-of-interest policies. All other authors declare no  
24 competing interests.

25

26 **Data Availability.** All data needed to evaluate the conclusions in the paper are present  
27 in the paper and/or the Supplementary Information.

28

## 29 **REFERENCES**

- 30 1. Qadri, F., Svennerholm, A.M., Faruque, A.S. & Sack, R.B. Enterotoxigenic  
31 Escherichia coli in developing countries: epidemiology, microbiology, clinical  
32 features, treatment, and prevention. *Clin Microbiol Rev* **18**, 465-483 (2005).

- 1 2. Khalil, I.A. et al. Morbidity and mortality due to shigella and enterotoxigenic  
2 Escherichia coli diarrhoea: the Global Burden of Disease Study 1990-2016.  
3 *Lancet Infect Dis* **18**, 1229-1240 (2018).
- 4 3. Lamberti, L.M., Bourgeois, A.L., Fischer Walker, C.L., Black, R.E. & Sack, D.  
5 Estimating diarrheal illness and deaths attributable to Shigellae and  
6 enterotoxigenic Escherichia coli among older children, adolescents, and adults in  
7 South Asia and Africa. *PLoS Negl Trop Dis* **8**, e2705 (2014).
- 8 4. Kotloff, K.L. et al. Burden and aetiology of diarrhoeal disease in infants and  
9 young children in developing countries (the Global Enteric Multicenter Study,  
10 GEMS): a prospective, case-control study. *Lancet* **382**, 209-222 (2013).
- 11 5. Guerrant, R.L., DeBoer, M.D., Moore, S.R., Scharf, R.J. & Lima, A.A. The  
12 impoverished gut--a triple burden of diarrhoea, stunting and chronic disease. *Nat*  
13 *Rev Gastroenterol Hepatol* **10**, 220-229 (2013).
- 14 6. Kotloff, K.L. et al. Global burden of diarrheal diseases among children in  
15 developing countries: Incidence, etiology, and insights from new molecular  
16 diagnostic techniques. *Vaccine* **35**, 6783-6789 (2017).
- 17 7. WHO 2020 WHO Product Development for Vaccines Advisory Committee  
18 (PDVAC). *Update on development of Enterotoxigenic E. coli (ETEC) vaccines*.  
19 (2020).
- 20 8. Bourgeois, A.L., Wierzba, T.F. & Walker, R.I. Status of vaccine research and  
21 development for enterotoxigenic Escherichia coli. *Vaccine* **34**, 2880-2886 (2016).
- 22 9. Riddle, M.S., Chen, W.H., Kirkwood, C.D. & MacLennan, C.A. Update on  
23 vaccines for enteric pathogens. *Clin Microbiol Infect* **24**, 1039-1045 (2018).
- 24 10. Fleckenstein, J.M. Confronting challenges to enterotoxigenic Escherichia coli  
25 vaccine development. *Front Trop Dis* **2** (2021).
- 26 11. Khalil, I. et al. Enterotoxigenic Escherichia coli (ETEC) vaccines: Priority activities  
27 to enable product development, licensure, and global access. *Vaccine* **39**, 4266-  
28 4277 (2021).
- 29 12. Fleckenstein, J.M. et al. Molecular mechanisms of enterotoxigenic Escherichia  
30 coli infection. *Microbes Infect* **12**, 89-98 (2010).
- 31 13. Darsley, M.J. et al. The oral, live attenuated enterotoxigenic Escherichia coli  
32 vaccine ACE527 reduces the incidence and severity of diarrhea in a human  
33 challenge model of diarrheal disease. *Clin Vaccine Immunol* **19**, 1921-1931  
34 (2012).
- 35 14. Harro, C. et al. Live attenuated enterotoxigenic Escherichia coli (ETEC) vaccine  
36 with dmLT adjuvant protects human volunteers against virulent experimental  
37 ETEC challenge. *Vaccine* **37**, 1978-1986 (2019).
- 38 15. Behrens, R.H. et al. Efficacy and safety of a patch vaccine containing heat-labile  
39 toxin from Escherichia coli against travellers' diarrhoea: a phase 3, randomised,  
40 double-blind, placebo-controlled field trial in travellers from Europe to Mexico and  
41 Guatemala. *Lancet Infect Dis* **14**, 197-204 (2014).
- 42 16. Chakraborty, S. et al. Human Experimental Challenge With Enterotoxigenic  
43 Escherichia coli Elicits Immune Responses to Canonical and Novel Antigens  
44 Relevant to Vaccine Development. *J Infect Dis* **218**, 1436-1446 (2018).



- 1 17. Svennerholm, A.M. et al. Induction of mucosal and systemic immune responses  
2 against the common O78 antigen of an oral inactivated ETEC vaccine in  
3 Bangladeshi children and infants. *Vaccine* **40**, 380-389 (2022).
- 4 18. Fleckenstein, J., Sheikh, A. & Qadri, F. Novel antigens for enterotoxigenic  
5 *Escherichia coli* vaccines. *Expert Rev Vaccines* **13**, 631-639 (2014).
- 6 19. Raetz, C.R. & Whitfield, C. Lipopolysaccharide endotoxins. *Annu Rev Biochem*  
7 **71**, 635-700 (2002).
- 8 20. Wolf, M.K. Occurrence, distribution, and associations of O and H serogroups,  
9 colonization factor antigens, and toxins of enterotoxigenic *Escherichia coli*. *Clin*  
10 *Microbiol Rev* **10**, 569-584 (1997).
- 11 21. Begum, Y.A. et al. Shift in phenotypic characteristics of enterotoxigenic  
12 *Escherichia coli* (ETEC) isolated from diarrheal patients in Bangladesh. *PLoS*  
13 *Negl Trop Dis* **8**, e3031 (2014).
- 14 22. Avery, O.T. & Goebel, W.F. Chemo-Immunological Studies on Conjugated  
15 Carbohydrate-Proteins : li. Immunological Specificity of Synthetic Sugar-Protein  
16 Antigens. *J Exp Med* **50**, 533-550 (1929).
- 17 23. Rappuoli, R. Glycoconjugate vaccines: Principles and mechanisms. *Sci Transl*  
18 *Med* **10** (2018).
- 19 24. Frasc, C.E. Preparation of bacterial polysaccharide-protein conjugates:  
20 analytical and manufacturing challenges. *Vaccine* **27**, 6468-6470 (2009).
- 21 25. Kay, E., Cuccui, J. & Wren, B.W. Recent advances in the production of  
22 recombinant glycoconjugate vaccines. *NPJ Vaccines* **4**, 16 (2019).
- 23 26. Feldman, M.F. et al. Engineering N-linked protein glycosylation with diverse O  
24 antigen lipopolysaccharide structures in *Escherichia coli*. *Proc Natl Acad Sci U S*  
25 *A* **102**, 3016-3021 (2005).
- 26 27. Stark, J.C. et al. On-demand biomanufacturing of protective conjugate vaccines.  
27 *Sci Adv* **7** (2021).
- 28 28. Celik, E. et al. Glycoarrays with engineered phages displaying structurally  
29 diverse oligosaccharides enable high-throughput detection of glycan-protein  
30 interactions. *Biotechnol J* **10**, 199-209 (2015).
- 31 29. Chen, L. et al. Outer membrane vesicles displaying engineered glycotopes elicit  
32 protective antibodies. *Proc Natl Acad Sci U S A* **113**, E3609-3618 (2016).
- 33 30. DuPont, H.L. et al. Pathogenesis of *Escherichia coli* diarrhea. *N Engl J Med* **285**,  
34 1-9 (1971).
- 35 31. Levine, M.M. et al. Immunity to enterotoxigenic *Escherichia coli*. *Infect Immun* **23**,  
36 729-736 (1979).
- 37 32. Chen, M.M., Glover, K.J. & Imperiali, B. From peptide to protein: comparative  
38 analysis of the substrate specificity of N-linked glycosylation in *C. jejuni*.  
39 *Biochemistry* **46**, 5579-5585 (2007).
- 40 33. Fisher, A.C. et al. Production of secretory and extracellular N-linked  
41 glycoproteins in *Escherichia coli*. *Appl Environ Microbiol* **77**, 871-881 (2011).
- 42 34. Ollis, A.A., Zhang, S., Fisher, A.C. & DeLisa, M.P. Engineered  
43 oligosaccharyltransferases with greatly relaxed acceptor-site specificity. *Nat*  
44 *Chem Biol* **10**, 816-822 (2014).
- 45 35. Borrow, R., Balmer, P. & Miller, E. Meningococcal surrogates of protection--  
46 serum bactericidal antibody activity. *Vaccine* **23**, 2222-2227 (2005).

- 1 36. Yang, X. et al. Serum antibodies protect against intraperitoneal challenge with  
2 enterotoxigenic *Escherichia coli*. *J Biomed Biotechnol* **2011**, 632396 (2011).
- 3 37. Sears, K.T. et al. Bioactive Immune Components of Anti-Diarrheagenic  
4 Enterotoxigenic *Escherichia coli* Hyperimmune Bovine Colostrum Products. *Clin*  
5 *Vaccine Immunol* **24** (2017).
- 6 38. Fleckenstein, J.M. & Rasko, D.A. Overcoming Enterotoxigenic *Escherichia coli*  
7 Pathogen Diversity: Translational Molecular Approaches to Inform Vaccine  
8 Design. *Methods Mol Biol* **1403**, 363-383 (2016).
- 9 39. Bolick, D.T. et al. Critical Role of Zinc in a New Murine Model of Enterotoxigenic  
10 *Escherichia coli* Diarrhea. *Infect Immun* **86** (2018).
- 11 40. Medeiros, P. et al. A bivalent vaccine confers immunogenicity and protection  
12 against *Shigella flexneri* and enterotoxigenic *Escherichia coli* infections in mice.  
13 *NPJ Vaccines* **5**, 30 (2020).
- 14 41. Chakraborty, S. et al. Impact of lower challenge doses of enterotoxigenic  
15 *Escherichia coli* on clinical outcome, intestinal colonization and immune  
16 responses in adult volunteers. *PLoS Negl Trop Dis* **12**, e0006442 (2018).
- 17 42. Warfel, K.F. et al. A low-cost, thermostable, cell-free protein synthesis platform  
18 for on demand production of conjugate vaccines. *bioRxiv*,  
19 2022.2008.2010.503507 (2022).
- 20 43. Levine, M.M. et al. Lack of person-to-person transmission of enterotoxigenic  
21 *Escherichia coli* despite close contact. *Am J Epidemiol* **111**, 347-355 (1980).
- 22 44. O'Neill, J. (2014).
- 23 45. Wacker, M. et al. Substrate specificity of bacterial oligosaccharyltransferase  
24 suggests a common transfer mechanism for the bacterial and eukaryotic  
25 systems. *Proc Natl Acad Sci U S A* **103**, 7088-7093 (2006).
- 26 46. Prevention, C.f.D.C.a. (2019).
- 27 47. Decker, J.S., Menacho-Melgar, R. & Lynch, M.D. Low-Cost, Large-Scale  
28 Production of the Anti-viral Lectin Griffithsin. *Front Bioeng Biotechnol* **8**, 1020  
29 (2020).
- 30 48. Hunt, J.P., Yang, S.O., Wilding, K.M. & Bundy, B.C. The growing impact of  
31 lyophilized cell-free protein expression systems. *Bioengineered* **8**, 325-330  
32 (2017).
- 33 49. Pardee, K. et al. Portable, On-Demand Biomolecular Manufacturing. *Cell* **167**,  
34 248-259 e212 (2016).
- 35 50. Zawada, J.F. et al. Microscale to manufacturing scale-up of cell-free cytokine  
36 production--a new approach for shortening protein production development  
37 timelines. *Biotechnol Bioeng* **108**, 1570-1578 (2011).
- 38 51. Adiga, R. et al. Point-of-care production of therapeutic proteins of good-  
39 manufacturing-practice quality. *Nat Biomed Eng* **2**, 675-686 (2018).
- 40 52. Needham, B.D. et al. Modulating the innate immune response by combinatorial  
41 engineering of endotoxin. *Proc Natl Acad Sci U S A* **110**, 1464-1469 (2013).
- 42 53. Jaroentomeechai, T. et al. Single-pot glycoprotein biosynthesis using a cell-free  
43 transcription-translation system enriched with glycosylation machinery. *Nat*  
44 *Commun* **9**, 2686 (2018).
- 45 54. Hershewe, J.M. et al. Improving cell-free glycoprotein synthesis by characterizing  
46 and enriching native membrane vesicles. *Nat Commun* **12**, 2363 (2021).

- 1 55. Lee, C.H. & Tsai, C.M. Quantification of bacterial lipopolysaccharides by the  
2 purpald assay: measuring formaldehyde generated from 2-keto-3-deoxyoctonate  
3 and heptose at the inner core by periodate oxidation. *Anal Biochem* **267**, 161-168  
4 (1999).
- 5 56. Valentine, J.L. et al. Immunization with Outer Membrane Vesicles Displaying  
6 Designer Glycotopes Yields Class-Switched, Glycan-Specific Antibodies. *Cell*  
7 *Chem Biol* **23**, 655-665 (2016).
- 8 57. Liu, J. et al. A laboratory-developed TaqMan Array Card for simultaneous  
9 detection of 19 enteropathogens. *J Clin Microbiol* **51**, 472-480 (2013).
- 10 58. Panchalingam, S. et al. Diagnostic microbiologic methods in the GEMS-1  
11 case/control study. *Clin Infect Dis* **55 Suppl 4**, S294-302 (2012).  
12
